# Supplementary material
Source: publisher site journal article supplement (https://www.spandidos-publications.com/4409/downloadSupplementary)

Figure S1. (A) RT-qPCR detected the expression level of miR-2113 in LNCaP cells transfected with miR-2113 mimics. (B) RT-qPCR detected the expression level of miR-2113 in LNCaP cells transfected with miR-2113 inhibitor. (C) Western blotting detected the expression level of MDM2 in LNCaP cells transfected with over-expression MDM2. \*\* $P < 0.01$ . RT-qPCR, reverse transcription-quantitative PCR; miR, microRNA; MDM2, murine double min 2.

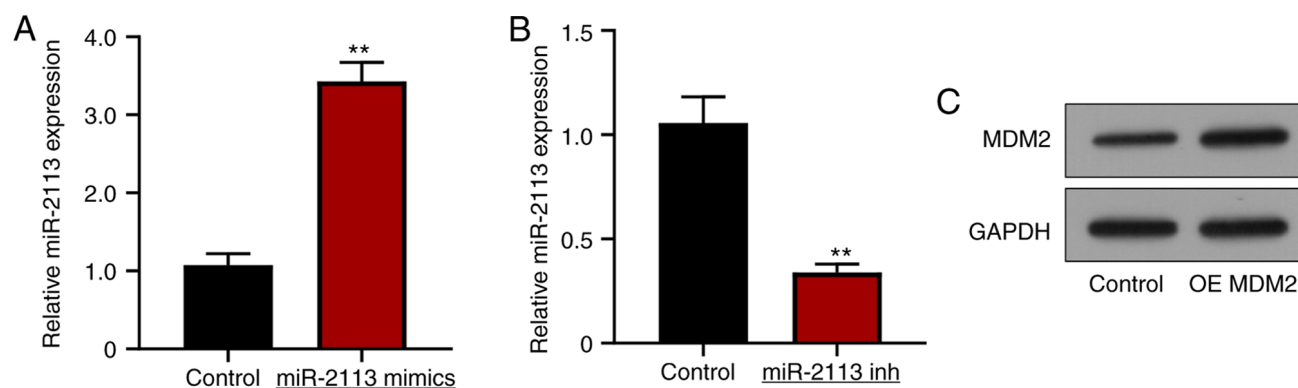

Supplement: Supplementary file 1 [file downloadSupplementary]
